# Supplementary material
Source: PubMed Central journal article supplement (PMC4561700)
Supplement: AEM.01842-15_zam999116583so1.pdf [file AEM.01842-15_zam999116583so1.pdf]

1 Supporting information

2 For

3 **Understanding the linkage between elevation and activated sludge bacterial community**  
4 **along a 3600 m elevational gradient in China**

5  
6 Lihua Niu, Yi Li \*, Peifang Wang, Wenlong Zhang \*, Chao Wang, Qing Wang

7 Ministry of Education Key laboratory of integrated regulation and resource development on shallow  
8 lakes, College of Environment, Hohai University, Nanjing 210098, P.R. China

9  
10 \* Corresponding author

11 Dr. Yi Li

12 Tel: +86 013776417768

13 Fax: 86-25-83786251

14 E-mail: [envly@hhu.edu.cn](mailto:envly@hhu.edu.cn).

15 Address: Ministry of Education Key laboratory of integrated regulation and resource  
16 development on shallow lakes, College of Environment, Hohai University, Nanjing 210098, P.R.  
17 China

18 Dr. Wenlong Zhang

19 E-mail address: [1223zhangwenlong@163.com](mailto:1223zhangwenlong@163.com).

20 Address: Ministry of Education Key laboratory of integrated regulation and resource development on  
21 shallow lakes, College of Environment, Hohai University, Nanjing 210098, P.R. China

22 **List of supporting information:**

23 **Table S1.** Geographic location of WWTPs investigated in this study.

24 **Table S2.** Operational parameters of WWTPs investigated in this study.

25 **Table S3.** Wastewater treatment performance of WWTPs investigated in this study.

26 **Table S4.** Numerical values assigned to the treatment processes according to the number of separate  
27 biological tanks.

28 **Table S5.** Number of OTUs at different abundant levels.

29 **Table S6.** Alpha diversity indices of bacterial communities of 63 activated sludge samples.

30 **Table S7.** Spearman correlation coefficients between diversity indices and environmental variables at  
31 elevations below 1200 masl.

32 **Table S8.** Spearman correlation coefficients between bacterial phyla and environmental variables at  
33 elevations above 1200 masl.

34 **Fig. S1.** Rarefaction analysis of one sample from each wastewater treatment plant.

35 **Fig. S2.** PCoA analysis with a UniFrac distance matrix comparing all the 63 samples.

36 **Fig. S3.** Clustering analysis based on Bray-Curtis distances on the OTU level among samples from 21  
37 wastewater treatment plant.

38 **Fig. S4.** Correlations between variables and community Shannon-H index (a), OTU richness (b), and  
39 evenness index (c). The ranges of variables corresponding to these high elevation WWTPs were  
40 pointed out by dotted rectangles.

41 **Fig. S5.** Variation in bacterial community evenness at the phylum level.

42

**Table S1.** Geographic location of WWTPs investigated in this study.

| WWTP | City      | Elevation<br>(masl) | Latitude<br>(N) | Longitude<br>(E) | Urban population density <sup>a</sup><br>(person/km <sup>2</sup> ) |
|------|-----------|---------------------|-----------------|------------------|--------------------------------------------------------------------|
| SH   | Shanghai  | 9                   | 31.1            | 121.1            | 3754                                                               |
| XM   | Xiamen    | 14                  | 24.3            | 118.1            | 3216                                                               |
| NJ   | Nanjing   | 18                  | 32.0            | 118.5            | 3341                                                               |
| NC   | Nanchang  | 20                  | 28.4            | 115.5            | 3276                                                               |
| HF   | Hefei     | 26                  | 31.5            | 117.1            | 3459                                                               |
| WH   | Wuhan     | 30                  | 30.4            | 114.2            | 2818                                                               |
| QD   | Qingdao   | 60                  | 36.2            | 120.3            | 1750                                                               |
| ZZ   | Zhengzhou | 110                 | 34.4            | 113.4            | 3681                                                               |
| CC   | Changchun | 218                 | 43.5            | 125.2            | 1792                                                               |
| CQ   | Chongqing | 261                 | 29.3            | 104.3            | 1474                                                               |
| XA   | Xian      | 383                 | 34.2            | 108.6            | 1877                                                               |
| CDS  | Chengdu   | 500                 | 30.3            | 104.0            | 2600                                                               |
| TY   | Taiyuan   | 800                 | 37.5            | 112.3            | 2010                                                               |
| GY   | Guiyang   | 1280                | 26.4            | 106.4            | 3444                                                               |
| LZ   | Lianzhou  | 1520                | 36.0            | 103.5            | 2281                                                               |
| KM   | Kunming   | 1900                | 25.0            | 102.4            | 2399                                                               |
| XN   | Sining    | 2272                | 36.4            | 101.5            | 1846                                                               |
| LJ   | Lijiang   | 2400                | 26.5            | 100.1            | 1962                                                               |
| GEM  | Golmud    | 2780                | 36.5            | 95.0             | 1690                                                               |
| CDX  | Qamdo     | 3200                | 31.1            | 97.1             | 1105                                                               |
| LS   | Lhasa     | 3660                | 29.4            | 91.1             | 889                                                                |

<sup>a</sup> Urban population density was calculated based on urban population divided by urban area around the WWTPs under study.



**Table S2.** Operational parameters of WWTPs investigated in this study.

| WWTP | DO<br>(mg/L) | SRT<br>(d) | Temp<br>(°C) | HRT<br>(h) | Process | pH  | TC<br>(10 <sup>3</sup> m <sup>3</sup> /d) | MLSS<br>(mg/L) | F/M<br>(g COD/g MLSS d <sup>-1</sup> ) | organic loading rate (kg/(m <sup>3</sup> d)) of |       |       |                    |       |
|------|--------------|------------|--------------|------------|---------|-----|-------------------------------------------|----------------|----------------------------------------|-------------------------------------------------|-------|-------|--------------------|-------|
|      |              |            |              |            |         |     |                                           |                |                                        | COD                                             | BOD   | TN    | NH <sub>4</sub> -N | TP    |
| SH   | 2.9          | 16         | 27.4         | 9.4        | AAO     | 6.9 | 70                                        | 5406           | 0.102                                  | 0.980                                           | 0.550 | 0.128 | 0.080              | 0.013 |
| XM   | 3            | 14         | 25.4         | 10.5       | AAO     | 6.5 | 56                                        | 3811           | 0.104                                  | 0.790                                           | 0.395 | 0.121 | 0.090              | 0.011 |
| NJ   | 2.9          | 15         | 28.2         | 14.2       | AO      | 6.5 | 35                                        | 5734.9         | 0.075                                  | 0.620                                           | 0.431 | 0.097 | 0.060              | 0.010 |
| NC   | 3.3          | 14         | 23.9         | 8.6        | CASS    | 6.7 | 65                                        | 3061.1         | 0.15                                   | 0.790                                           | 0.458 | 0.142 | 0.090              | 0.009 |
| HF   | 2.4          | 14         | 26.2         | 13.4       | AO      | 7   | 87                                        | 7220.4         | 0.063                                  | 0.720                                           | 0.455 | 0.158 | 0.102              | 0.010 |
| WH   | 3.7          | 11         | 26.3         | 14.5       | AO      | 6.7 | 78                                        | 5907.1         | 0.088                                  | 0.750                                           | 0.521 | 0.090 | 0.067              | 0.005 |
| QD   | 2.5          | 13         | 20.9         | 8.7        | AAO     | 7.1 | 100                                       | 4389.5         | 0.114                                  | 0.700                                           | 0.502 | 0.111 | 0.074              | 0.020 |
| ZZ   | 4.1          | 15         | 25.3         | 11.2       | AAO     | 7.2 | 22                                        | 5532.3         | 0.068                                  | 0.710                                           | 0.377 | 0.077 | 0.059              | 0.012 |
| CC   | 5.4          | 15         | 18.1         | 18.5       | OD      | 7.1 | 85                                        | 2029.3         | 0.051                                  | 0.240                                           | 0.103 | 0.076 | 0.044              | 0.008 |
| CQ   | 2.5          | 14         | 28.6         | 10.6       | AAO     | 6.3 | 23                                        | 3886.8         | 0.115                                  | 0.510                                           | 0.447 | 0.066 | 0.043              | 0.010 |
| XA   | 2.2          | 13         | 22.6         | 4.7        | CASS    | 7.3 | 56                                        | 3235.1         | 0.319                                  | 1.620                                           | 1.031 | 0.154 | 0.080              | 0.020 |
| CDS  | 2.8          | 14         | 26.6         | 8.3        | AAO     | 6.4 | 60                                        | 2383.4         | 0.153                                  | 0.740                                           | 0.364 | 0.098 | 0.071              | 0.011 |
| TY   | 3.1          | 14         | 26           | 9.3        | AAO     | 7.2 | 88                                        | 7609.5         | 0.09                                   | 1.200                                           | 0.687 | 0.247 | 0.169              | 0.008 |
| GY   | 2.4          | 13         | 23.1         | 13.5       | AO      | 6.5 | 74                                        | 5679.9         | 0.083                                  | 0.770                                           | 0.471 | 0.059 | 0.039              | 0.008 |
| LZ   | 2.5          | 11         | 22           | 7.2        | AAO     | 7.3 | 107                                       | 4313.2         | 0.136                                  | 1.100                                           | 0.588 | 0.157 | 0.093              | 0.016 |
| KM   | 2.4          | 12         | 22.4         | 9.1        | AAO     | 7.1 | 53                                        | 3599           | 0.128                                  | 0.870                                           | 0.462 | 0.087 | 0.052              | 0.010 |
| XN   | 2.3          | 13         | 24.2         | 19.1       | OD      | 6.7 | 61                                        | 3653           | 0.056                                  | 0.380                                           | 0.205 | 0.045 | 0.035              | 0.003 |
| LJ   | 2.7          | 11         | 25.7         | 12.3       | AO      | 6.9 | 58                                        | 3565           | 0.09                                   | 0.550                                           | 0.322 | 0.105 | 0.060              | 0.005 |
| GEM  | 2.7          | 14         | 22.8         | 12.6       | AAO     | 6.6 | 35                                        | 2931.7         | 0.1                                    | 0.530                                           | 0.294 | 0.061 | 0.048              | 0.005 |
| CDX  | 1.8          | 12         | 21.1         | 13.2       | AAO     | 6.8 | 25                                        | 2403           | 0.103                                  | 0.450                                           | 0.248 | 0.055 | 0.040              | 0.002 |
| LS   | 1.5          | 14         | 20.6         | 12.8       | CASS    | 7   | 28                                        | 1812.8         | 0.1                                    | 0.410                                           | 0.182 | 0.054 | 0.034              | 0.002 |

TC, treatment capacity; F/M, food/microorganism ratio.



**Table S3.** Wastewater treatment performance of WWTPs investigated in this study.

| WWTP | Influent concentration (mg/L) of |       |      |                    |     |      | Effluent concentration (mg/L) of |      |      |                    |                 | Removal (%) of |      |      |                 |                 |
|------|----------------------------------|-------|------|--------------------|-----|------|----------------------------------|------|------|--------------------|-----------------|----------------|------|------|-----------------|-----------------|
|      | COD                              | BOD   | TN   | NH <sub>4</sub> -N | TP  | C/N  | COD                              | BOD  | TN   | NH <sub>4</sub> -N | TP              | COD            | BOD  | TN   | NH <sub>4</sub> | TP              |
| SH   | 385.4                            | 215.6 | 50.2 | 31.2               | 5.0 | 7.7  | 39.2                             | 8.5  | 13.6 | 1.5                | 0.3             | 89.8           | 96.1 | 97.0 | 95.2            | 94.0            |
| XM   | 347.5                            | 173.0 | 53.1 | 39.5               | 4.8 | 6.5  | 35.5                             | 7.9  | 12.5 | 1.7                | 0.4             | 89.7           | 95.4 | 96.8 | 95.7            | 91.7            |
| NJ   | 367.5                            | 255.0 | 57.5 | 35.6               | 6.1 | 6.4  | 25.8                             | 8.3  | 14.7 | 2.0                | 0.3             | 92.9           | 96.7 | 96.5 | 94.4            | 95.1            |
| NC   | 281.4                            | 164.0 | 50.9 | 32.2               | 3.4 | 5.5  | 36.3                             | 9.1  | 13.6 | 1.6                | 0.2             | 87.1           | 94.5 | 96.9 | 95.0            | 94.1            |
| HF   | 402.2                            | 254.0 | 88.0 | 57.1               | 5.5 | 4.6  | 27.6                             | 9.7  | 13.2 | 1.5                | 0.5             | 93.1           | 96.2 | 98.3 | 97.4            | 90.9            |
| WH   | 451.6                            | 314.5 | 54.6 | 40.5               | 2.8 | 8.3  | 40.4                             | 10.1 | 12.6 | 1.8                | 0.1             | 91.1           | 96.8 | 96.7 | 95.6            | 96.4            |
| QD   | 254.3                            | 181.8 | 40.3 | 26.7               | 7.2 | 6.3  | 43.5                             | 6.5  | 14.8 | 2.3                | 0.4             | 82.9           | 96.4 | 94.3 | 91.4            | 94.4            |
| ZZ   | 329.0                            | 176.0 | 36.0 | 27.4               | 5.8 | 9.1  | 47.0                             | 5.0  | 14.9 | 2.0                | 0.1             | 85.7           | 97.2 | 94.4 | 92.7            | 98.3            |
| CC   | 186.3                            | 79.6  | 58.3 | 34.1               | 6.3 | 3.2  | 39.8                             | 6.9  | 12.7 | 1.6                | 0.1             | 78.6           | 91.3 | 97.3 | 95.3            | 98.4            |
| CQ   | 226.7                            | 197.6 | 29.0 | 18.8               | 4.4 | 7.8  | 27.6                             | 8.8  | 13.1 | 1.8                | 0.4             | 87.8           | 95.5 | 93.8 | 90.4            | 90.9            |
| XA   | 318.0                            | 202.0 | 30.2 | 15.6               | 4.0 | 10.5 | 45.8                             | 7.8  | 13.8 | 1.3                | 0.1             | 85.6           | 96.1 | 95.7 | 91.7            | 97.5            |
| CDS  | 256.0                            | 126.0 | 34.0 | 24.7               | 3.7 | 7.5  | 46.1                             | 6.5  | 12.4 | 1.7                | ND <sup>a</sup> | 82.0           | 94.8 | 95.0 | 93.1            | NA <sup>b</sup> |
| TY   | 463.7                            | 266.3 | 95.7 | 65.3               | 3.1 | 4.8  | 43.7                             | 6.7  | 14.3 | 1.5                | ND              | 90.6           | 97.5 | 98.4 | 97.7            | NA              |
| GY   | 431.8                            | 265.0 | 33.4 | 22.0               | 4.3 | 12.9 | 36.2                             | 10.5 | 15.3 | 1.2                | ND              | 91.6           | 96.0 | 96.4 | 94.5            | NA              |
| LZ   | 328.9                            | 176.4 | 47.0 | 28.0               | 4.9 | 7    | 28.0                             | 8.8  | 18.7 | 1.6                | 0.3             | 91.5           | 95.0 | 96.6 | 94.3            | 93.9            |
| KM   | 330.4                            | 175.0 | 33.0 | 19.6               | 3.9 | 10   | 28.7                             | 6.3  | 16.8 | 1.6                | ND              | 91.3           | 96.4 | 95.2 | 91.8            | NA              |
| XN   | 301.0                            | 163.0 | 36.0 | 27.8               | 2.4 | 8.4  | 30.3                             | 7.2  | 14.3 | 1.8                | ND              | 89.9           | 95.6 | 95.0 | 93.5            | NA              |
| LJ   | 284.2                            | 164.8 | 54.0 | 30.7               | 2.8 | 5.3  | 29.4                             | 4.6  | 13.6 | 3.0                | ND              | 89.7           | 97.2 | 94.4 | 90.2            | NA              |
| GEM  | 277.2                            | 154.6 | 32.0 | 25.0               | 2.6 | 8.7  | 26.7                             | 8.7  | 10.7 | 3.8                | ND              | 90.4           | 94.4 | 88.1 | 84.8            | NA              |
| CDX  | 245.0                            | 136.3 | 30.0 | 22.0               | 1.1 | 8.2  | 33.9                             | 9.1  | 8.8  | 4.8                | ND              | 86.2           | 93.3 | 84.0 | 78.2            | NA              |
| LS   | 218.0                            | 97.0  | 29.0 | 18.0               | 0.9 | 7.5  | 46.7                             | 7.6  | 9.1  | 5.4                | ND              | 78.6           | 92.2 | 81.4 | 70.0            | NA              |

<sup>a</sup>ND, not detected; <sup>b</sup>NA, not analyzed.





**Table S4.** Numerical values assigned to the treatment processes according to the number of separate biological tanks.

| Treatment process | Biological tanks | Numerical value |
|-------------------|------------------|-----------------|
| AAO               | AnT,AxT, AT      | 3               |
| AO                | AxT, AT          | 2               |
| OD                | AnT,SAAnT        | 2.5             |
| CASS              | SAAAnAxT         | 1.5             |

AT, aerobic tank; AnT, anaerobic tank; AxT, anoxic tank; SAAnT, simultaneous aerobic and anoxic tank; SAAAnAxT, simultaneous aerobic, anaerobic, and anoxic tank.

**Table S5.** Number of OTUs at different abundant levels.

| N_reads per OTU              | $\geq 10000$ | $\geq 1000$ | $\geq 100$ | $\geq 10$ | $\geq 1$ |
|------------------------------|--------------|-------------|------------|-----------|----------|
| Total samples                |              |             |            |           |          |
| N_OTUs                       | 13           | 43          | 890        | 12495     | 19345    |
| Percentage of OTUs           | 0.07%        | 0.22%       | 4.60%      | 64.59%    | 100%     |
| N_reads                      | 117838       | 161329      | 317624     | 482275    | 503366   |
| Percentage of Reads          | 23.41%       | 32.05%      | 63.10%     | 95.81%    | 100%     |
| Individual samples           |              |             |            |           |          |
| Averaged N_OTUs              | 0            | 0           | 40         | 626       | 1064     |
| Averaged Percentage of OTUs  | 0            | 0.00%       | 3.76%      | 58.83%    | 100%     |
| Averaged N_reads             | 0            | 0           | 3564       | 7375      | 7990     |
| Averaged Percentage of Reads | 0            | 0.00%       | 44.61%     | 92.30%    | 100%     |

**Table S6.** Alpha diversity indices of bacterial communities of 63 activated sludge samples.

| Lable | Shannon-H <sup>a</sup> | Evenness <sup>b</sup> | No. of OTUs <sup>c</sup> | No. of reads <sup>d</sup> |
|-------|------------------------|-----------------------|--------------------------|---------------------------|
| SH1   | 6.209                  | 0.8796                | 1362                     | 8,261                     |
| SH2   | 6.225                  | 0.8322                | 1388                     | 7,854                     |
| SH3   | 6.206                  | 0.8578                | 1358                     | 7,765                     |
| XM1   | 5.942                  | 0.8925                | 1003                     | 8,010                     |
| XM2   | 5.997                  | 0.8968                | 1068                     | 8,845                     |
| XM3   | 5.983                  | 0.9209                | 1051                     | 7,852                     |
| NJ1   | 6.147                  | 0.8862                | 1268                     | 7,952                     |
| NJ2   | 6.174                  | 0.8673                | 1309                     | 8,554                     |
| NJ3   | 6.133                  | 0.8965                | 1248                     | 8,622                     |
| NC1   | 5.903                  | 0.8075                | 960                      | 9,068                     |
| NC2   | 5.968                  | 0.8333                | 1033                     | 8,581                     |
| NC3   | 5.948                  | 0.8525                | 1010                     | 8,346                     |
| HF1   | 6.067                  | 0.8244                | 1157                     | 7,247                     |
| HF2   | 6.077                  | 0.8376                | 1170                     | 8,050                     |
| HF3   | 6.052                  | 0.8421                | 1137                     | 7,267                     |
| WH1   | 6.059                  | 0.8774                | 1146                     | 7,856                     |
| WH2   | 6.092                  | 0.9054                | 1191                     | 8,851                     |
| WH3   | 6.046                  | 0.8934                | 1129                     | 7,740                     |
| QD1   | 6.159                  | 0.8192                | 1286                     | 6,925                     |
| QD2   | 6.192                  | 0.8091                | 1336                     | 7,988                     |
| QD3   | 6.128                  | 0.8215                | 1241                     | 7,440                     |
| ZZH1  | 5.972                  | 0.9053                | 1038                     | 9,390                     |
| ZZH2  | 5.985                  | 0.8393                | 1053                     | 8,148                     |
| ZZH3  | 5.945                  | 0.8402                | 1006                     | 8,264                     |
| CC1   | 5.98                   | 0.8071                | 1047                     | 7,522                     |
| CC2   | 5.935                  | 0.8492                | 995                      | 8,745                     |
| CC3   | 5.929                  | 0.8241                | 989                      | 7,877                     |
| CQ1   | 6.111                  | 0.797                 | 1217                     | 8,020                     |
| CQ2   | 6.12                   | 0.824                 | 1230                     | 9,165                     |
| CQ3   | 6.171                  | 0.8105                | 1304                     | 8,960                     |
| XA1   | 5.914                  | 0.8113                | 972                      | 8,045                     |
| XA2   | 5.995                  | 0.8043                | 1065                     | 7,263                     |
| XA3   | 5.975                  | 0.7998                | 1041                     | 7,989                     |
| CDS1  | 5.924                  | 0.8584                | 983                      | 7,104                     |
| CDS2  | 5.959                  | 0.8118                | 1022                     | 7,754                     |
| CDS3  | 5.928                  | 0.8205                | 987                      | 8,005                     |

| Lable | Shannon-H <sup>a</sup> | Evenness <sup>b</sup> | No. of OTUs <sup>c</sup> | No. of reads <sup>d</sup> |
|-------|------------------------|-----------------------|--------------------------|---------------------------|
| TY1   | 6.124                  | 0.8406                | 1235                     | 7,055                     |
| TY2   | 6.139                  | 0.8307                | 1257                     | 7,537                     |
| TY3   | 6.108                  | 0.8586                | 1213                     | 7,660                     |
| GY1   | 6.107                  | 0.9229                | 1211                     | 6,650                     |
| GY2   | 6.119                  | 0.8666                | 1228                     | 7,655                     |
| GY3   | 6.142                  | 0.8876                | 1261                     | 8,444                     |
| LZ1   | 5.967                  | 0.8559                | 1032                     | 7,480                     |
| LZ2   | 5.955                  | 0.8455                | 1018                     | 8,110                     |
| LZ3   | 5.971                  | 0.8745                | 1036                     | 9,564                     |
| KM1   | 5.884                  | 0.8447                | 940                      | 7,795                     |
| KM2   | 5.933                  | 0.8346                | 993                      | 8,633                     |
| KM3   | 5.902                  | 0.8136                | 959                      | 7,828                     |
| XN1   | 5.875                  | 0.7802                | 931                      | 8,657                     |
| XN2   | 5.838                  | 0.8022                | 895                      | 7,577                     |
| XN3   | 5.85                   | 0.8084                | 906                      | 8,654                     |
| LJ1   | 5.832                  | 0.7438                | 889                      | 7,357                     |
| LJ2   | 5.813                  | 0.7645                | 871                      | 8,585                     |
| LJ3   | 5.822                  | 0.7367                | 880                      | 8,526                     |
| GEM1  | 5.818                  | 0.7057                | 876                      | 7,160                     |
| GEM2  | 5.797                  | 0.6833                | 857                      | 6,971                     |
| GEM3  | 5.793                  | 0.6925                | 853                      | 6,540                     |
| CDX1  | 5.766                  | 0.6563                | 830                      | 8,020                     |
| CDX2  | 5.755                  | 0.6621                | 821                      | 8,525                     |
| CDX3  | 5.732                  | 0.6356                | 802                      | 7,257                     |
| LS1   | 5.739                  | 0.6263                | 808                      | 7,823                     |
| LS2   | 5.728                  | 0.6158                | 799                      | 7,368                     |
| LS3   | 5.746                  | 0.6321                | 814                      | 8,550                     |

**Table S7.** Spearman correlation coefficients between diversity indices and partial environmental variables at elevations below 1200 masl.

| Variable                    | Richness | Evenness | OTUs   |
|-----------------------------|----------|----------|--------|
| Elevation                   | -0.225   | -0.418   | -0.011 |
| Latitude                    | 0.346    | -0.099   | -0.038 |
| Longitude                   | 0.44     | 0.11     | 0.066  |
| influent TN                 | 0.258    | 0.143    | 0.011  |
| influent NH <sub>4</sub> -N | 0.22     | 0.308    | 0.022  |
| influent COD                | 0.275    | 0.571    | 0.099  |
| influent BOD5               | 0.544    | 0.242    | 0.132  |
| influent TP                 | 0.396    | 0.06     | 0.099  |
| pH                          | -0.006   | -0.039   | -0.395 |
| SRT                         | 0.253    | 0.297    | 0.169  |
| Treatment Process           | 0.322    | 0.045    | 0.455  |
| DO                          | -0.152   | 0.256    | -0.259 |
| Temp                        | 0.39     | 0.269    | 0.516  |
| MLSS                        | 0.489    | 0.225    | 0.203  |

**Table S8.** Spearman correlation coefficients between bacterial phyla and partial environmental variables at elevations above 1200 masl.

|                       | Influent NH <sub>4</sub> -N | Influent TP | Treatment process | DO     | Temperature |
|-----------------------|-----------------------------|-------------|-------------------|--------|-------------|
| OD1                   | 0.335                       | 0.952*      | 0.064             | 0.482  | 0.452       |
| Gemmatimonadetes      | 0.383                       | 0.833       | 0.268             | 0.337  | 0.5         |
| Chlorobi              | 0.048                       | 0.548       | 0.268             | 0.337  | 0.643       |
| TM7                   | 0.271                       | 0.898*      | 0.128             | 0.37   | 0.371       |
| Lentisphaerae         | -0.096                      | 0.548       | 0.23              | -0.157 | 0.238       |
| Spirochaetes          | 0.339                       | 0.361       | -0.168            | 0.171  | 0.06        |
| Cyanobacteria         | 0.12                        | 0.429       | 0.192             | 0.024  | -0.024      |
| Acidobacteria         | -0.277                      | 0.144       | -0.045            | 0.2    | 0.443       |
| Firmicutes            | -0.144                      | -0.786      | -0.281            | -0.108 | -0.214      |
| Deltaproteobacteria   | 0.395                       | 0.929*      | 0.153             | 0.699  | 0.286       |
| Epsilonproteobacteria | 0.359                       | 0.595       | 0.562             | 0.337  | 0.5         |
| Planctomycetes        | 0.53                        | 0.683       | 0.019             | 0.418  | 0.563       |
| Nitrospira            | 0.241                       | 0.659       | -0.238            | 0.642  | 0.719       |
| Verrucomicrobia       | -0.072                      | 0.619       | 0.498             | 0.133  | 0.286       |
| Chloroflexi           | 0.795                       | 0.455       | 0.629             | 0.521  | 0.635       |
| Actinobacteria        | -0.252                      | 0.024       | -0.038            | 0.06   | 0.19        |
| Alphaproteobacteria   | -0.108                      | 0.262       | 0.077             | 0.12   | 0.643       |
| Gammaproteobacteria   | -0.168                      | -0.143      | 0.294             | -0.325 | -0.143      |
| Betaproteobacteria    | -0.287                      | -0.905*     | -0.204            | -0.374 | -0.429      |
| Bacteroidetes         | -0.287                      | -0.905*     | -0.204            | -0.374 | -0.429      |

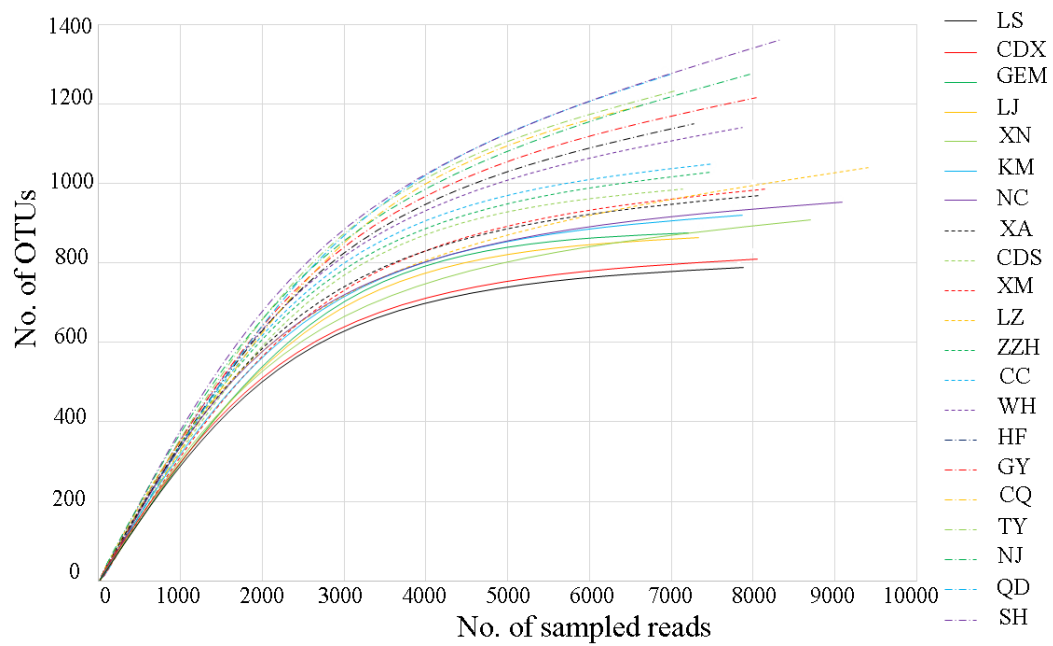

**Fig. S1.** Rarefaction analysis of one sample from each wastewater treatment plant.

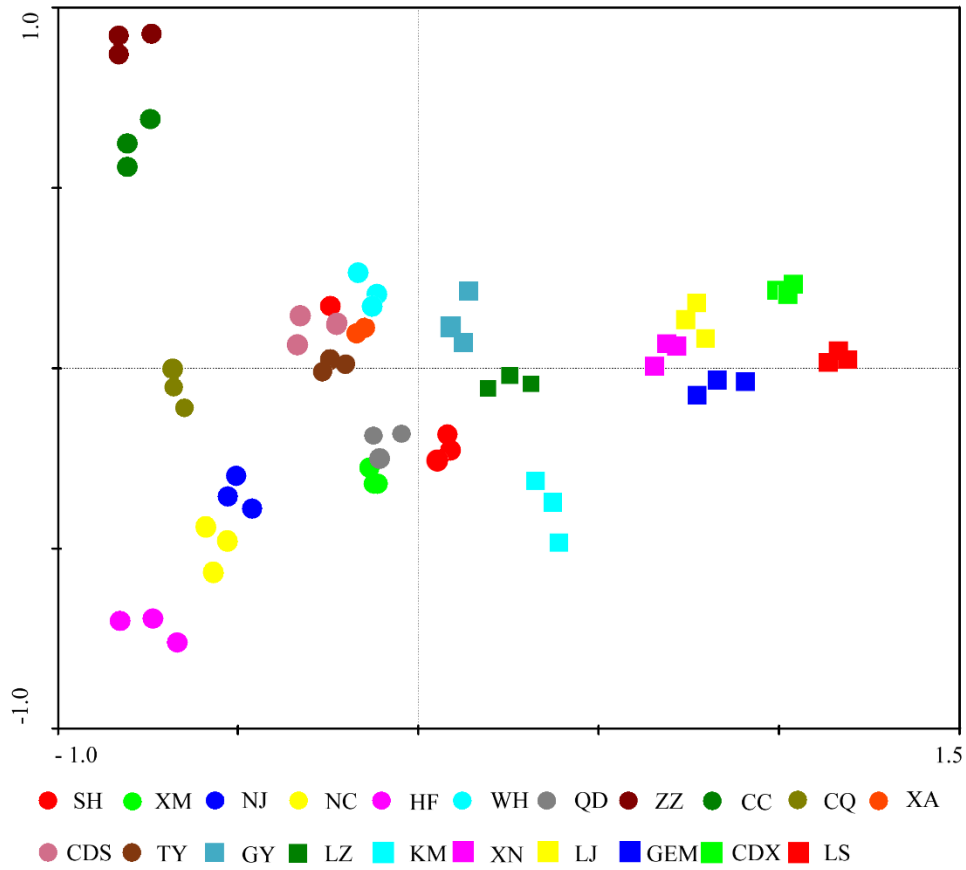

**Fig. S2.** PCoA analysis with a UniFrac distance matrix comparing all the 63 samples.



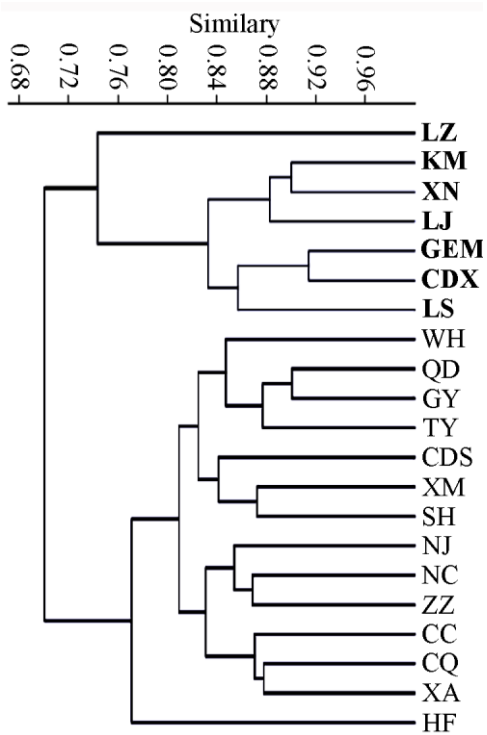

**Fig. S3.** Clustering analysis based on Bray-Curtis distances on the OTU level among samples from 21 wastewater treatment plant.

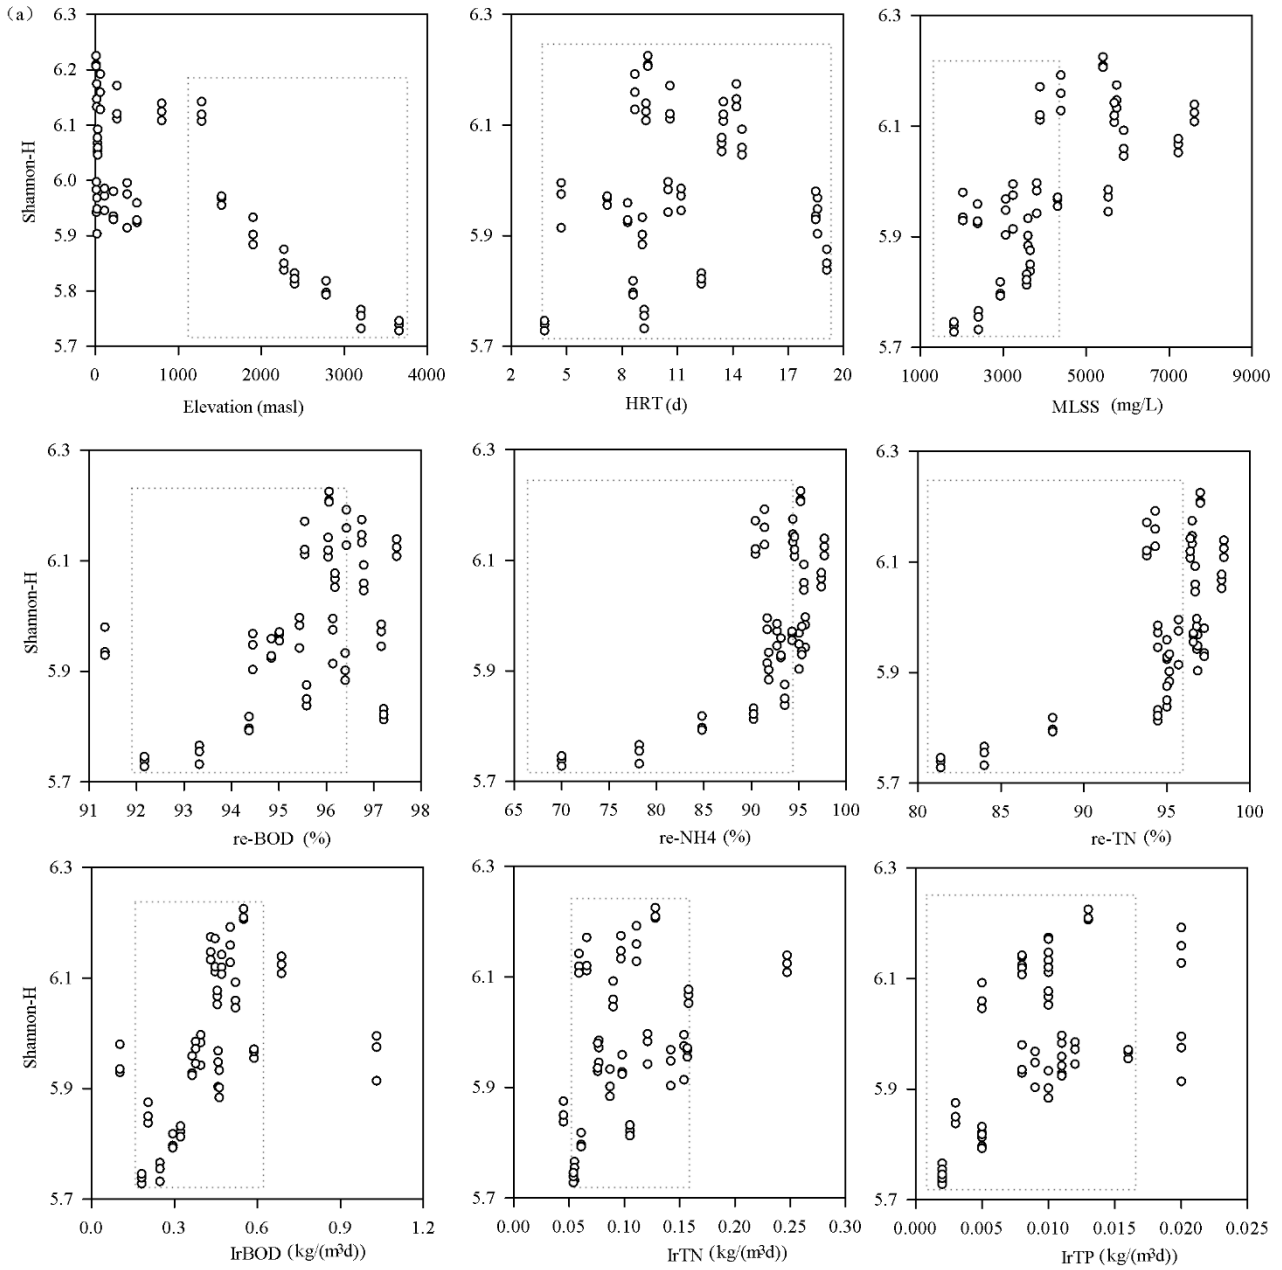

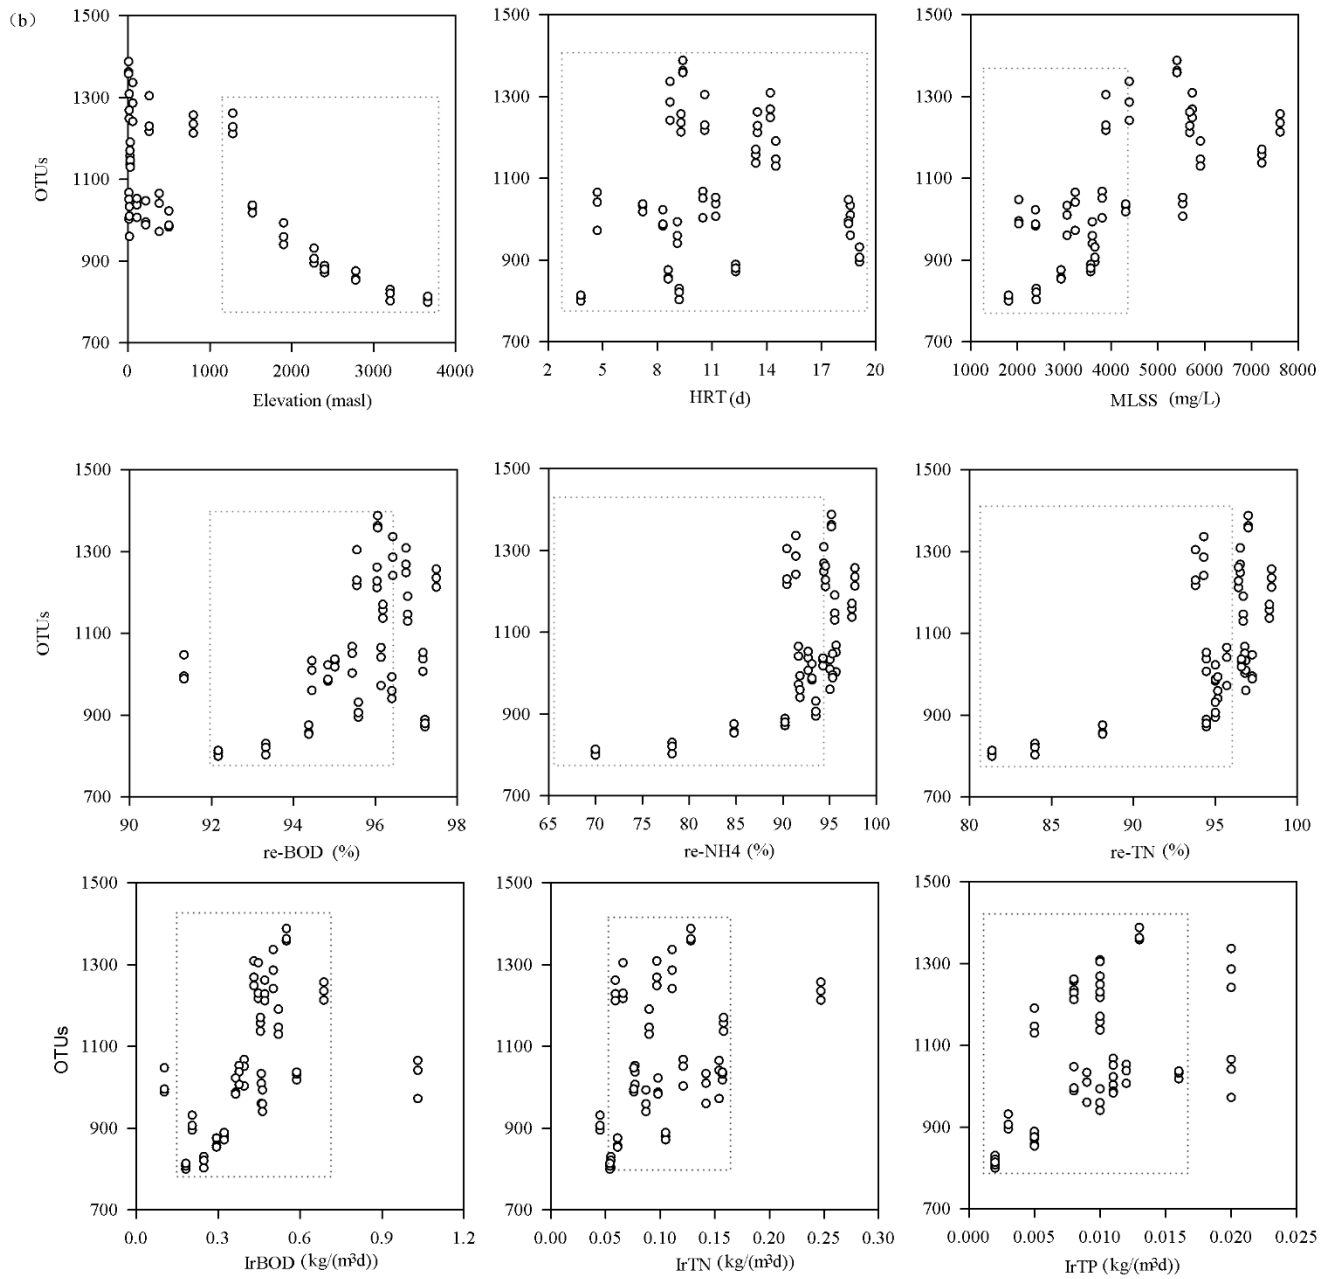

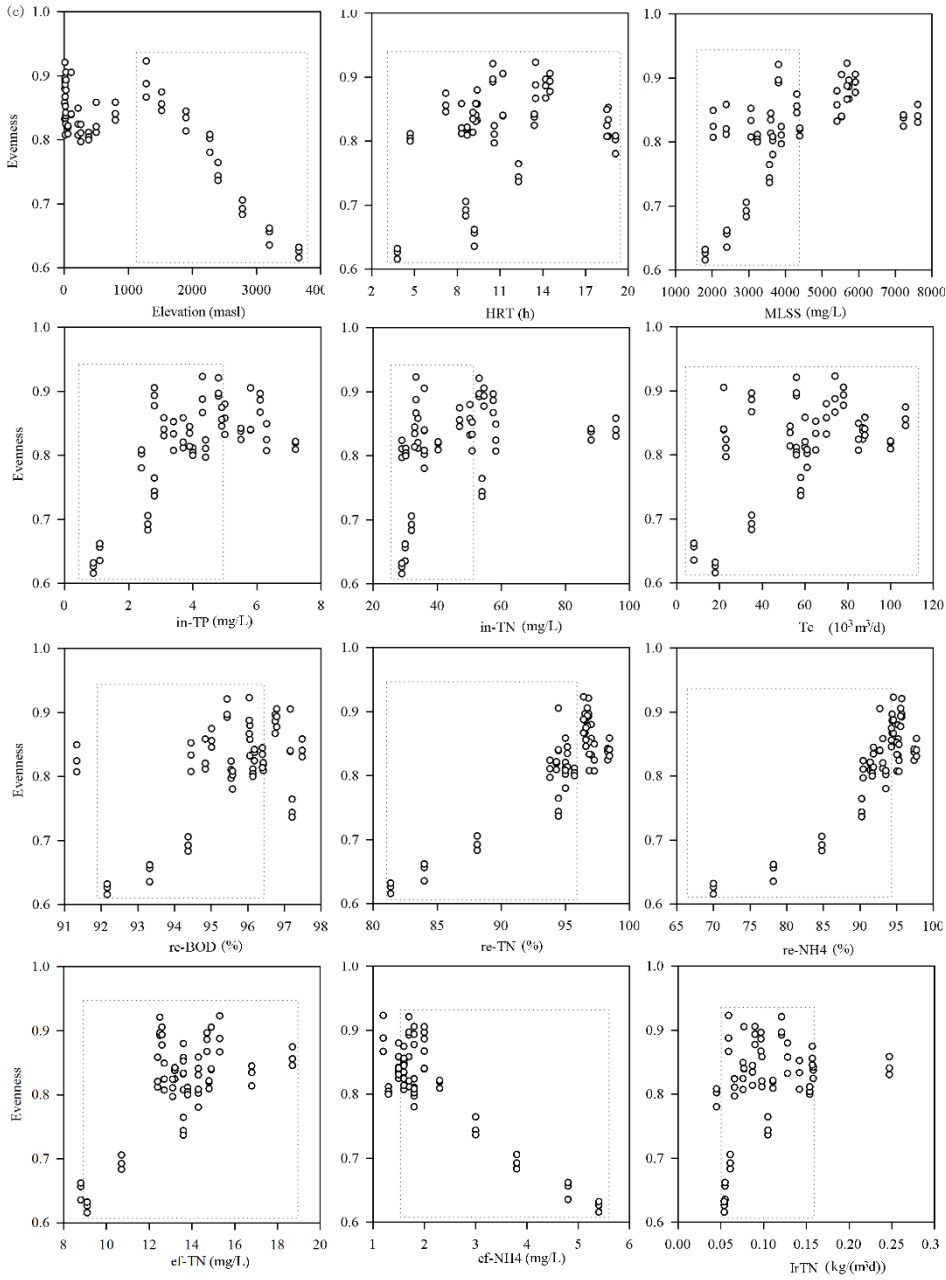

**Fig. S4.** Correlations between variables and bacterial community Shannon-H index (a), OTU richness (b), and evenness index (c). The ranges of variables corresponding to these high elevation WWTPs were pointed out by dotted rectangles.

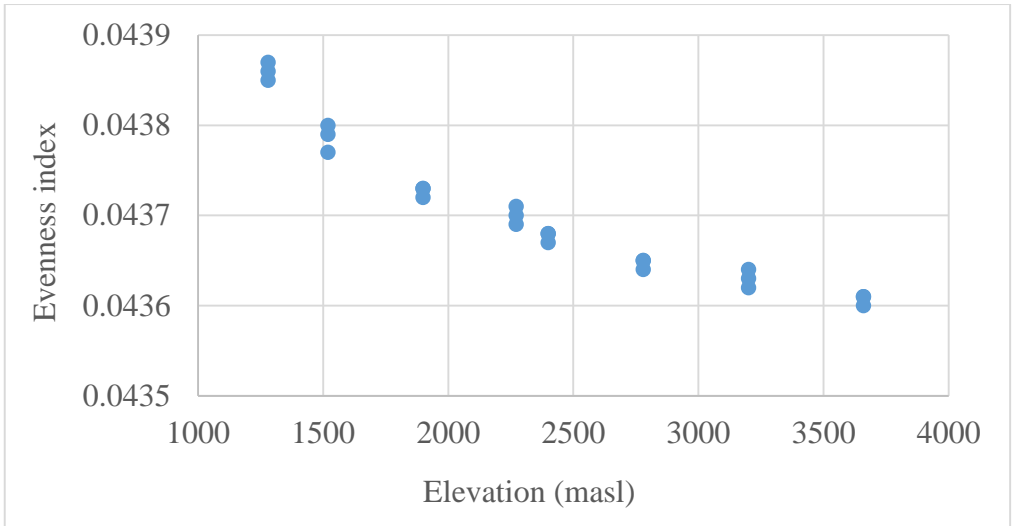

**Fig. S5.** Variation in bacterial community evenness at the phylum level.
